# Supplementary material for: Whole-Exome Sequencing Uncovers Specific Genetic Variation Difference Based on Different Modes of Drug Resistance in Small Cell Lung Cancer
Source: Front Oncol. 2022 Jun 30;12:891938. doi: 10.3389/fonc.2022.891938 (PMC9280676; doi:10.3389/fonc.2022.891938)
Supplement: Supplementary Table 1 — Eigenvalues of the two groups in total. [file Table_1.xlsx]

## Sheet: Sheet1
Supplement table1.The chatacteristics of the cohort
Characteristic		Resistant		Sentisive	P value
Gender
Female		14(24.6)		36(30.0)	0.48
Male		43(75.4)		84(70.0)
Age
Young(<=60)		28(49.1)		46(38.3)	0.19
Old(>60)		29(50.9)		74(61.7)
Smoking
No		19(33.3)		50(41.7)	0.32
Yes		38(66.7)		70(58.3)
Drinking
No		30(52.6)		74(61.7)	0.72
Yes		26(45.6)		45(37.5)
Family history
No		38(66.7)		90(75.0)	0.33
Yes		16(28.1)		23(19.2)
Primary site
Lung		45(78.9)		99(84.6)	0.39
Lymth		12(21.1)		18(15.4)
Metastases
No		47(82.5)		100(83.3)	1
Yes		10(17.5)		20(16.7)
Stage
Extensive-stage		37(64.9)		55(45.8)	0.024
Limited-stage		20(35.1)		65(54.2)
